# Supplementary material for: Structure-flexible DNA origami translocation through a solid-state nanopore
Source: Royal Society of Chemistry journal article supplement (doi:10.1039/d1ra04267j), 2021-01-01
Supplement: d1ra04267j1.pdf [file d1ra04267j1.pdf]

## Supporting Information: Structure-Flexible DNA Origami

### Translocation through a Solid-State Nanopore

Jing Yang,<sup>\*a,b</sup> Nan Zhao,<sup>a,†</sup> Yuan Liang,<sup>a,†</sup> Zuhong Lu<sup>\*c</sup> and Cheng Zhang<sup>\*b</sup>

|                                                                         |    |
|-------------------------------------------------------------------------|----|
| Section S1. Materials and Apparatus.....                                | 1  |
| Section S2. Nanopores Experiments Preparations .....                    | 1  |
| S2.1. Silicon Nitride Nanopores Fabrication and Measurement. .          | 1  |
| S2.2. Preparation before the nanopore detection .....                   | 1  |
| Section S3. Data recording and translocation data analysis .....        | 2  |
| Section S4. Designs of the DNA origami.....                             | 2  |
| Section S5. Preparations of DNA origami.....                            | 4  |
| Section S6. Analysis of translocation events .....                      | 4  |
| Section S7. TEM measurements of DNA origami .....                       | 8  |
| Section S8. Dispersion analysis of translocation events.....            | 12 |
| Section S9. Characterization of origami-2 loaded with streptavidin..... | 14 |
| Section S10. The DNA sequences used in the experiment.....              | 16 |

## **Section S1. Materials and Apparatus**

M13mp18 DNA was purchased from NEB (Beijing). All short DNA staple strands were ordered from Sangon Biotech (Shanghai) Co., Ltd.. Streptavidin was from NEB (Beijing). The nanopore was fabricated on silicon nitride (SiN) wafers (NJRI-001, Nanjing Rhode Nanotech Co. Ltd., China). Transmission electron microscope (FEI Tecnai F30, Netherlands, Philips-FEI) was used to fabricate nanopores on 30 nm thick SiN membrane. The nanopore detection device was an Axopatch 700B .

## **Section S2. Nanopores Experiments Preparations**

### **S2.1. Silicon Nitride Nanopores Fabrication and Measurement.**

To produce a suitable nanopore, a focused electron beam of 300 kV, 70  $\mu$ A from the TEM was used to form a roughly hourglass-shaped nanopore in the center of the SiN free-standing membrane. The expected nanopore diameter is 20 nm. In fact, the nanopore size ranges from 18 nm to 23 nm.

### **S2.2. Preparation before the nanopore detection**

Before detection, the nanopore chips were firstly soaked in piranha solution (98% H<sub>2</sub>SO<sub>4</sub>: 30% H<sub>2</sub>O<sub>2</sub> = 3:1) for 30 minutes. Then, the wafers were rinsed using ultrapure water and preserved in 50% ethanol solution. After assembling the nanopore electric conductivity measurement equipment, the tubings for loading and flowing of the samples were washed with ethanol and then with ultrapure water. To perform the nanopore experiments, the DNA origami samples were diluted into a final buffer solution containing 0.5  $\times$ TBE, 11 mM Mg<sup>2+</sup> and 1 M KCl. The sample solution was loaded and analyzed using the prepared nanopore chamber.

Samples were added to the cis side, and a positive biased voltage was applied. Under the applied biased voltages, the target origami were driven through the nanopore by electrophoretic force, which resulted in different translocation events. All of the nanopore data were recorded and extracted using Clampfit.

### **Section S3. Data recording and translocation data analysis**

In the experiment, a fixed voltage in the range of 300-600 mV across the membrane was applied via Ag/AgCl electrodes through Teflon chambers. To construct a complete electric current circuit, a positive voltage was applied on the trans side of nanopores and the grounded voltage was applied on the cis side. In the electrical recording step, the experiment was performed in  $0.5 \times$  TBE buffer pH 7.5, containing 1 M KCl and 11 mM MgCl<sub>2</sub>, at room temperature by applying a 100 kHz sampling rate and a 10 kHz low-pass Bessel filter. The electrical signals were amplified using an Axopatch 700B patch clamp amplifier (Axon Instruments) and digitized with a Digidata 1550 A/D converter (Axon Instruments). Data were recorded using the Clampex 10.4 software (Molecular Devices) and subsequent analysis was carried out using the Clampfit software (Molecular Devices).

In the experiment, the recorded data was further analyzed by Opennanopore software. The values of current blockage and dwell time from the translocation events were collected to yield statistic results using Matlab.

### **Section S4. Designs of the DNA origami**

In this experiment, three origami were designed by Cadnano. The nanostructures rely on complementary base-pairing of M13 scaffold (7249nt) and different ssDNA staples for assembly. In this design, origin origami was named as origami-1. The entire structure is rigid at both ends and soft in the middle. Deformed structures, origami-2 and origami-3 were obtained by adding several ssDNA oligos. The detailed design of DNA origami are displayed in Fig. S1.

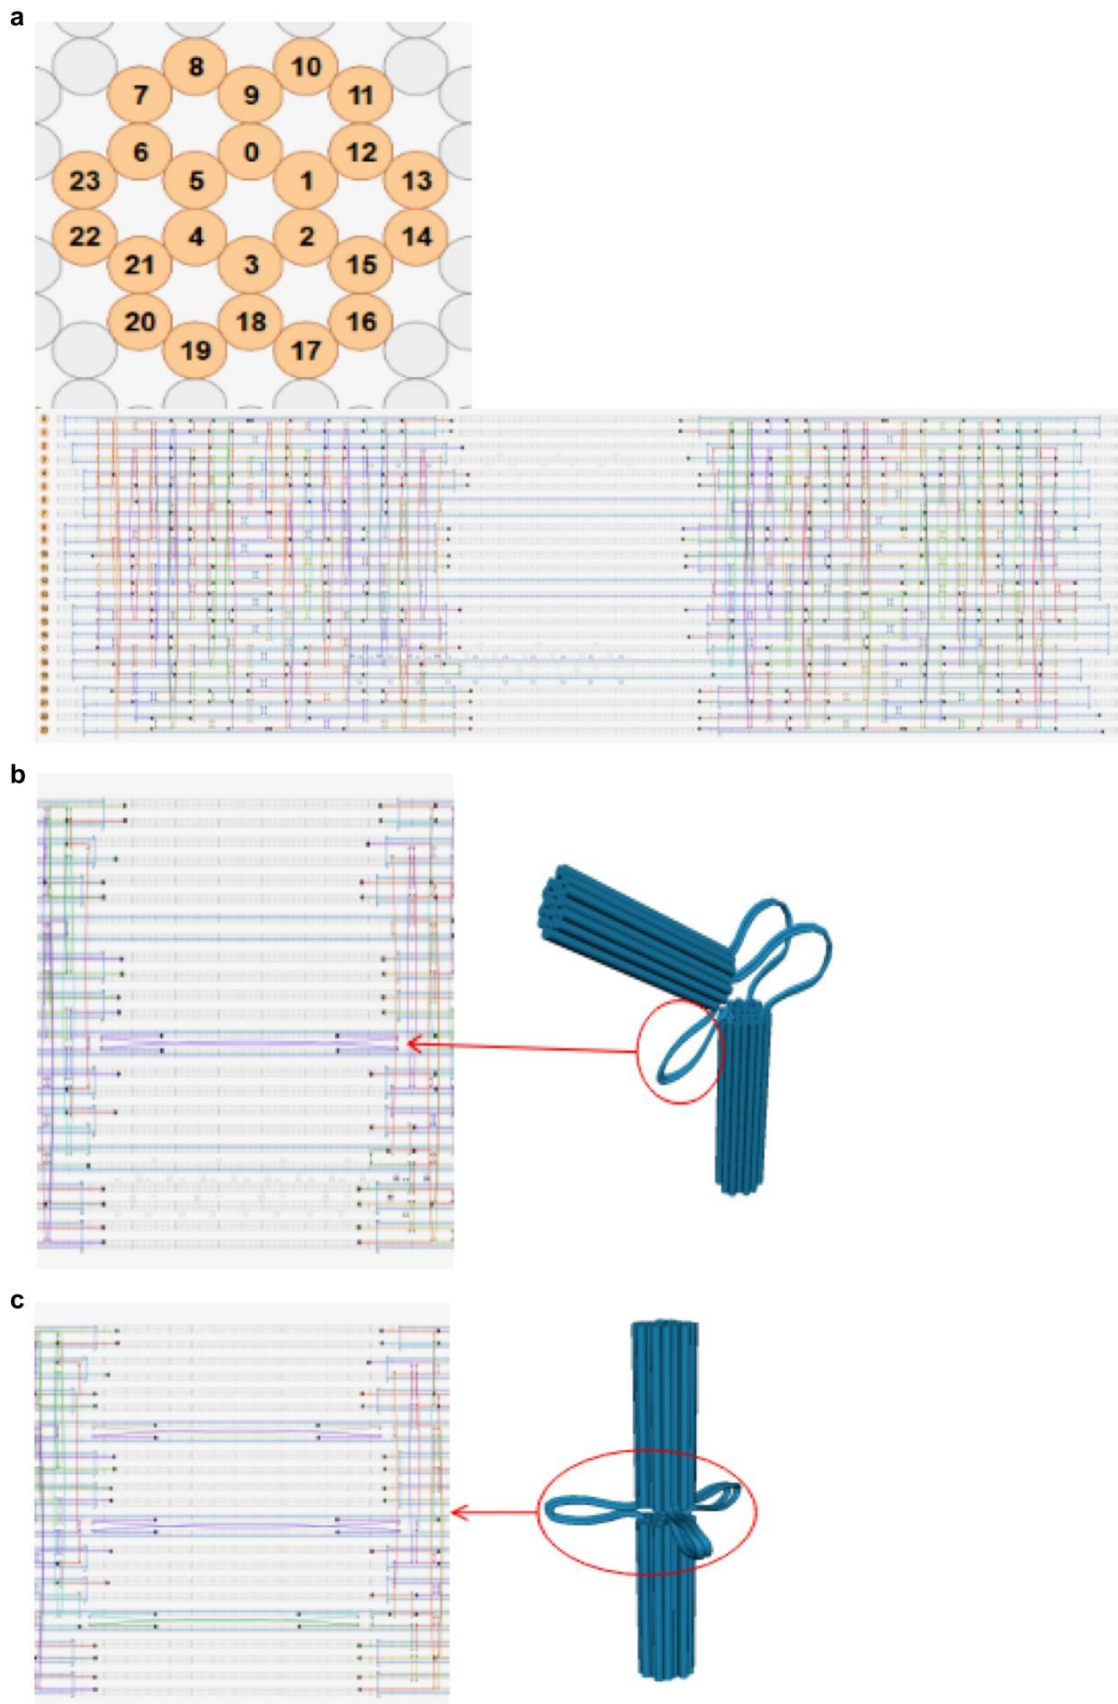

**Figure S1.** The details of the origami designed by Cadnano. (a) The cross section of origami-1 is on the top. It is easy to see that this structure has 24 double helices, which

are arranged into a cylindrical. The complementary details between m13mp18 and 145 staples is on the below. (b) Six single-strands newly added are complementary to the middle part of the origami and pull the two ends together to form the origami-3. (c) Two single-strands newly added are complementary to a pair of connectors and form the origami-2. The length of the strands causing the deformations are all 42nt.

### **Section S5. Preparations of DNA origami**

The DNA origami were assembled by hybridization of M13mp18 scaffold and hundreds of staple DNA strands with the concentration ratio of 1:10 (final concentration 20 nM), in  $1\times$  TAE, 11 mM  $Mg^{2+}$  buffer. The annealing program was carried out from  $80^{\circ}C$  to  $65^{\circ}C$  at a rate of  $-1^{\circ}C/min$  and then from  $65^{\circ}C$  to  $25^{\circ}C$  at a rate of  $-1^{\circ}C/20$  min. After annealing, the origami products were purified using an 1% agarose gel (running buffer:  $0.5\times$  TBE, 11 mM  $Mg^{2+}$ . 1.5 hour, 70 V, stained with EB and detected under UV) .

The purification process involved extraction of the well-formed DNA origami structure from the gel: 1) the target gel bands were excised from the gel, cut into pieces and frozen under  $-20^{\circ}C$  for 5 minutes, 2) then the gel blocks were thawed and centrifuged for 4 minutes at 12000 rpm using Freeze Squeeze filters (Bio-Rad). The purified products were collected and the UV absorption at 260 nm was measured to determine the DNA concentration (using the origami extinction coefficient:  $1.091\times 10^8$   $M^{-1} cm^{-1}$ ) .

### **Section S6. Analysis of translocation events**

According to the number of events captured in the same time, it was demonstrated that the frequency of events increases, as the voltage increases (Fig. S2).

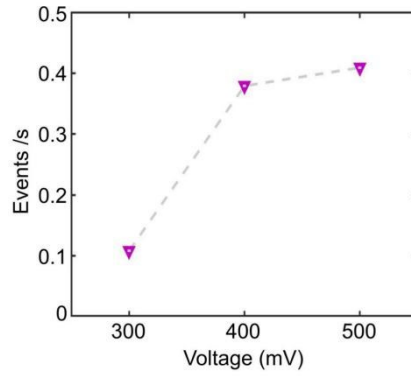

**Figure S2.** Line diagram of event frequency versus voltage.

Fig. S3 showed representative scatter plots for origami-1 translocations in 1 M KCl buffer through a 20 nm nanopore, recorded at 300, 400 and 500 mV applied across the membrane. For origami-1, the mean blockage currents were about 1431 pA, 1565 pA, 1697 pA, the mean dwell time were about 0.64ms, 0.47ms, 0.46ms for applied biases of 300 mV, 400 mV, and 500 mV, respectively (Fig. S3c). Here, the results indicated that with the increasing applied voltages, the value of the current blockage increased accordingly, but the duration time of translocation events decreased.

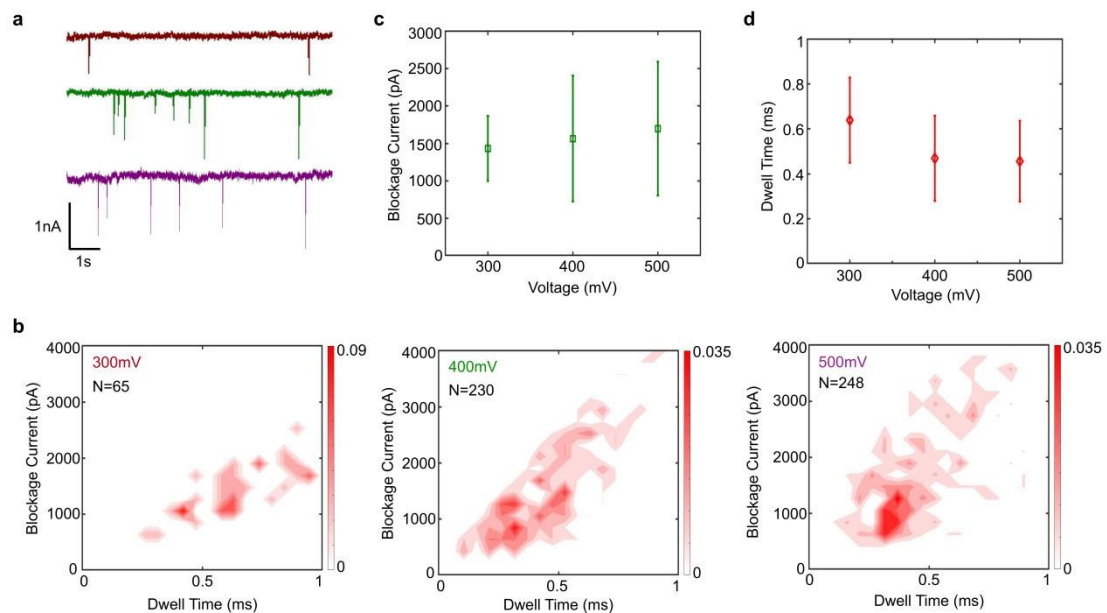

**Figure S3.** Scatter plots of origami-1 with applied voltage of 300, 400 and 500mV individually. (a) Three current traces in the same time with three applied voltages. (b) Scatter plot of maximum current blockage versus dwell time, histograms of the maximum blockage and dwell time distribution. (c) Mean maximum blockage of DNA

origami as a function of applied voltage. (d) Mean dwell time of DNA origami as a function of applied voltage. All experiments are performed in 1M KCl, pH 8.0.

For the three origami, each origami creates a unique current trace (characteristic signal) as it passes through the nanopore. Fig. S4 showed the characteristic signals of origami-1. It can be seen that a single signal starts from an instantaneous current drop (called the primary-level current) from the standard current level, then the current will rise to a certain level (secondary-level current) for a period of time, and then fall again, and finally rise to the standard current level. We speculate that the primary-level current is generated by the nano-cylinders of origami-1 through nanopore, and the secondary-level current is generated by the single-strands in the middle of origami-1.

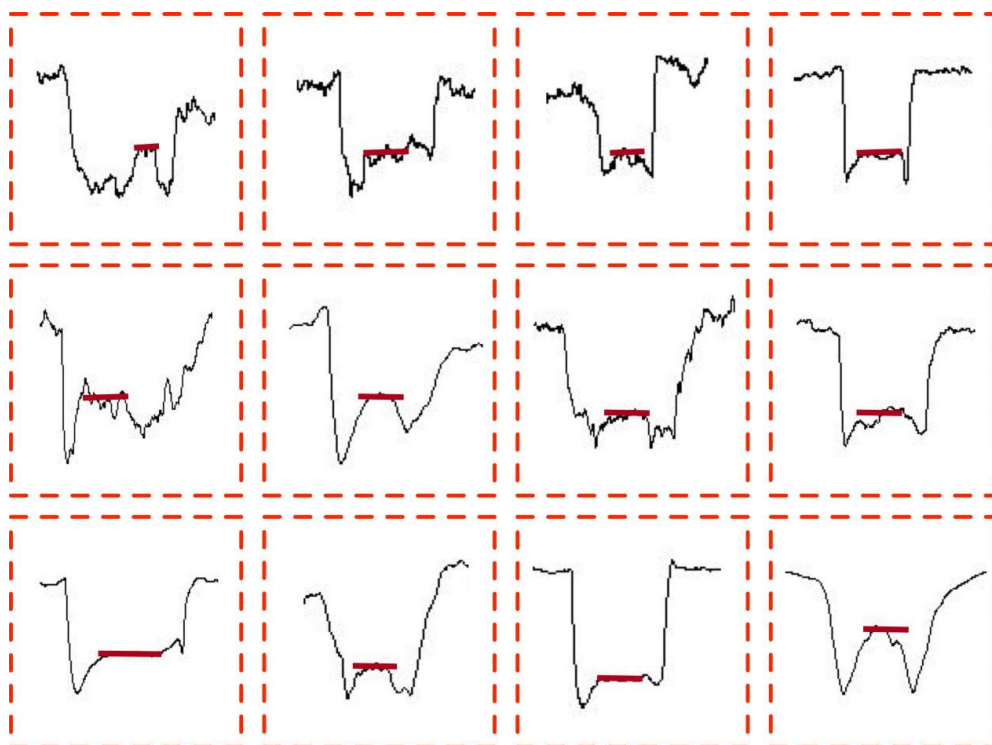

Figure S4. Characteristic signals of origami-1. The red line indicates the duration of the second-level current.

Fig. S5 showed the characteristic signals of origami-2. Origami-2's characteristic signals looks very similar to origami-1's, except that the secondary current duration is shorter. Because origami-2 has almost no distance in the middle.

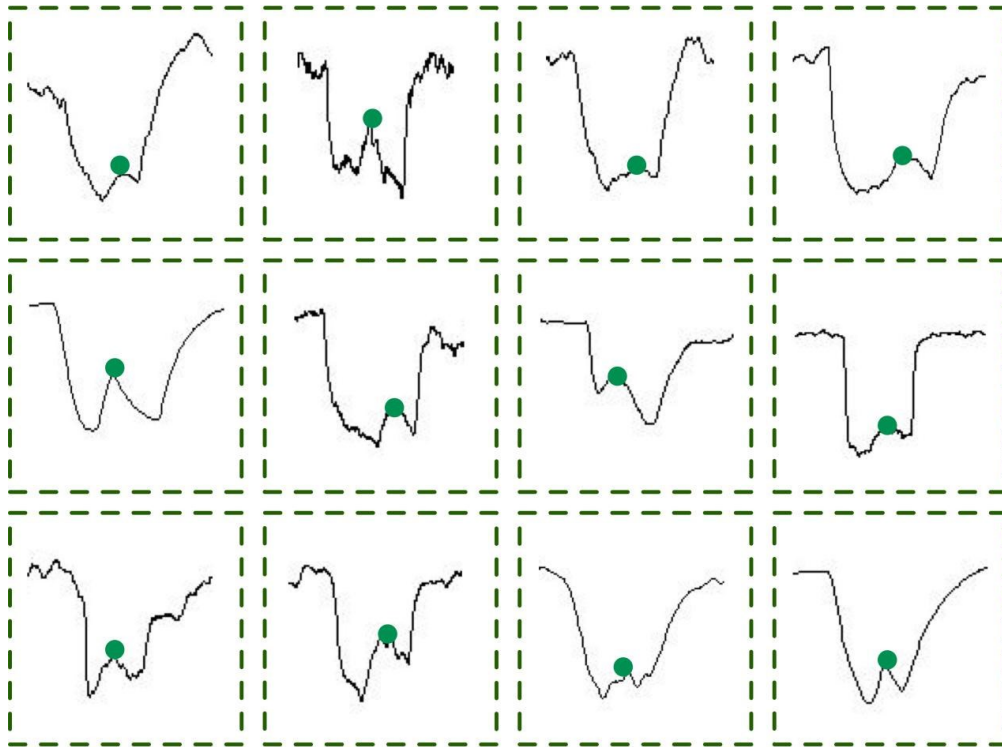

Figure S5. Characteristic signals of origami-1. The green dot indicates the second-level current.

Fig. S6 showed the characteristic signals of origami-3. Origami-3's characteristic signals has no second-level current. Because origami-3 has no distance in the middle.

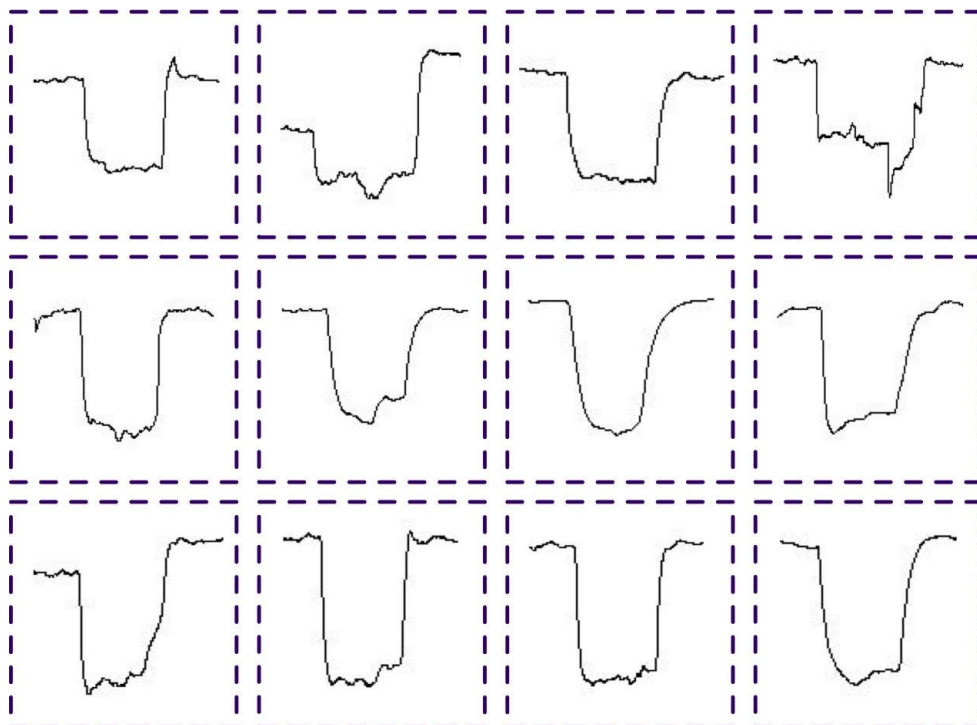

Figure S6. Characteristic signals of origami-3.



## Section S7. TEM measurements of DNA origami

Theoretically, the angle range of origami-1, origami-2, origami-3 are  $0^\circ$  to  $360^\circ$ ,  $0^\circ$  to  $180^\circ$ ,  $180^\circ$  (Fig S7). TEM images of origami-1, origami-2 and origami-3 were shown in Fig. S8, S9, S10. From the statistical results, the actual angles of origami-1 range from  $90^\circ$  to  $180^\circ$ (Fig. S8), the actual angles of origami-2 range from  $40^\circ$  to  $180^\circ$ (Fig. S9), and the actual angles of origami-3 range from  $150^\circ$  to  $180^\circ$ (Fig. S10).

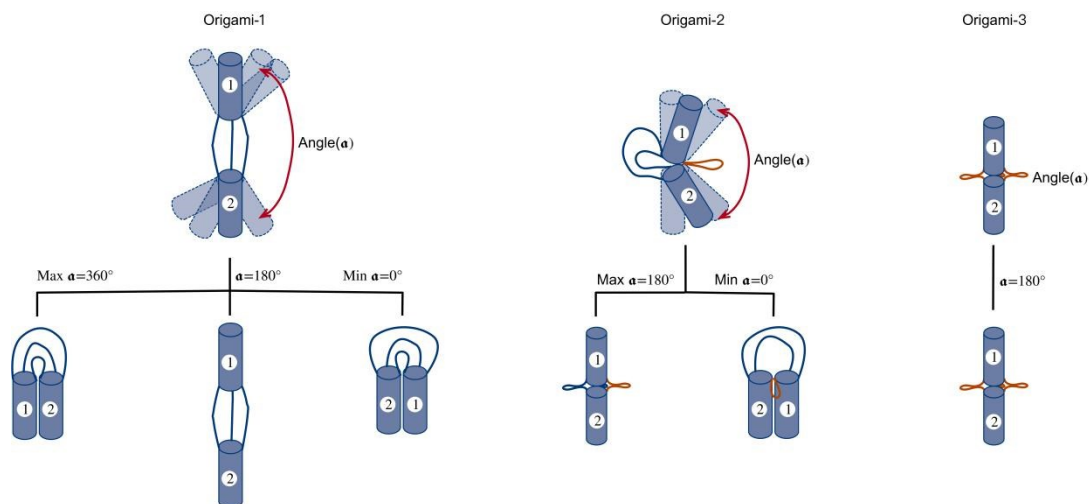

Figure S7. Schematic diagram of angle flexibility of three origami.

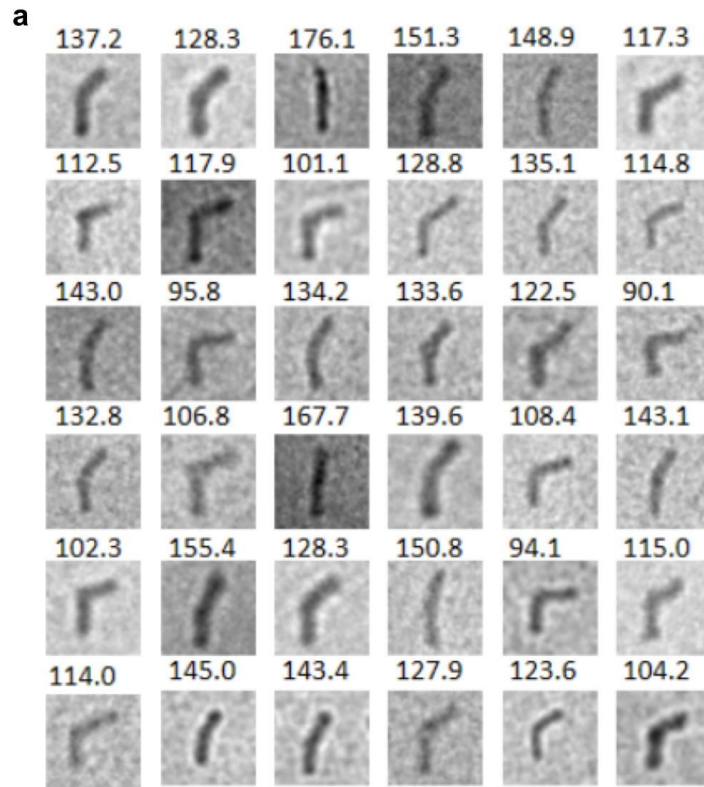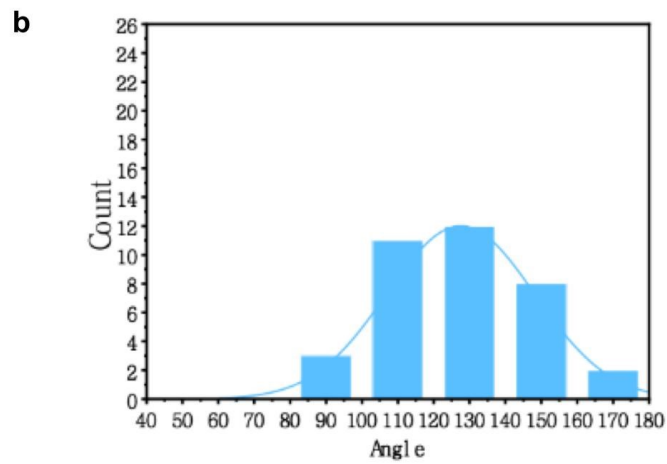

Figure S8. TEM images of the origami-1. (a) The angle array and statistical results of origami-1. The numbers are measured smaller angles. (b) The angle distributions of origami-1.

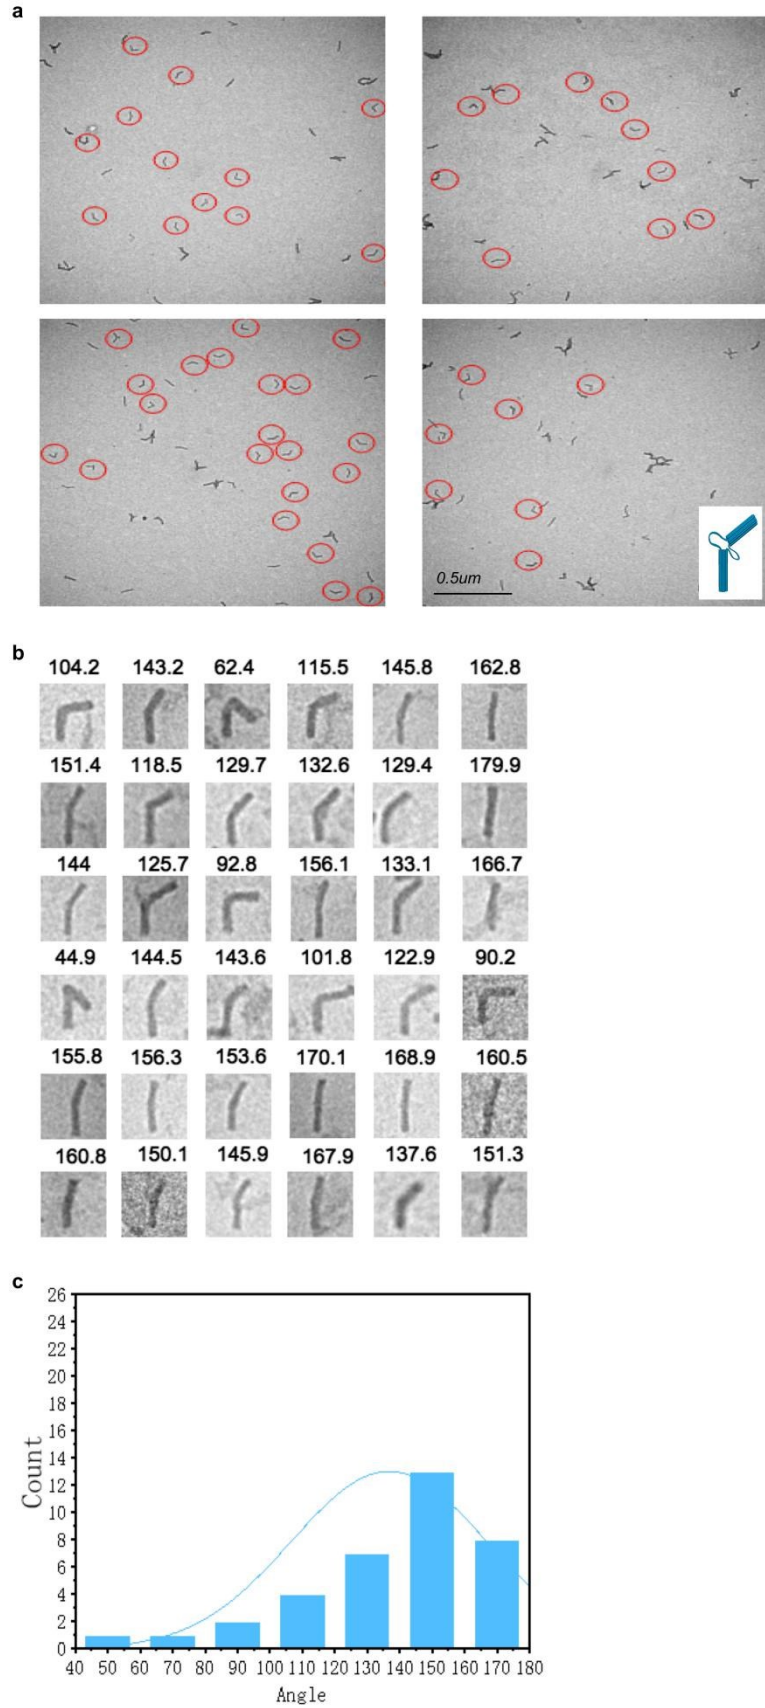

**Figure S9.** TEM images of the origami-2. (a) The images are under a wide view. The red circles enclosed the structures with clear angles. (b) The angle array and statistical

results of origami-2. The numbers are measured smaller angles. (c) The angle distributions of origami-2.

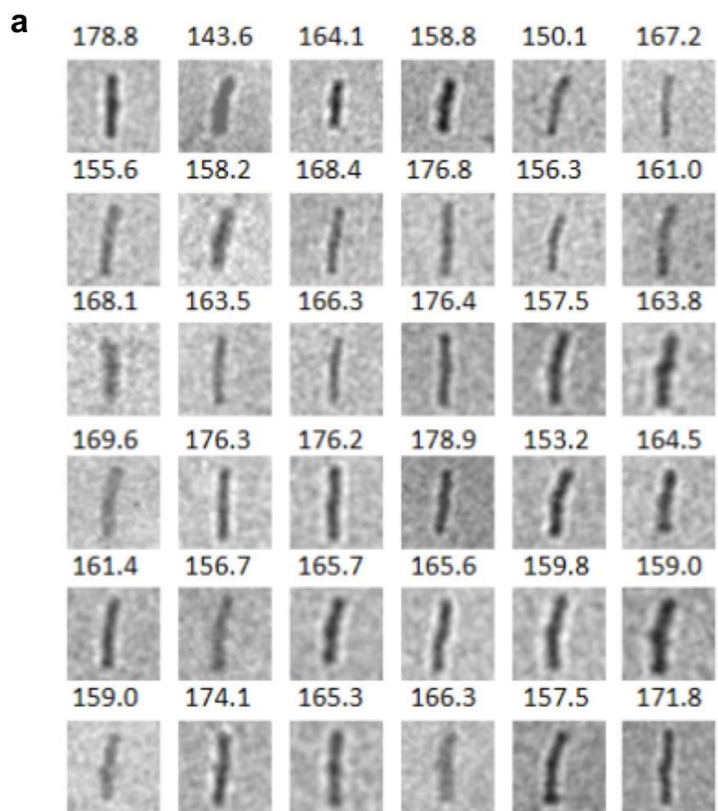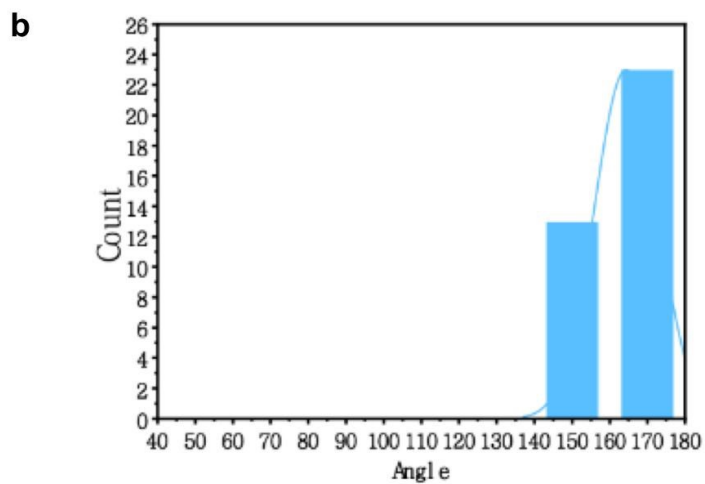

Figure S10. TEM images of the origami-3. (a) The angle array and statistical results of origami-3. The numbers are measured smaller angles. (b) The angle distributions of origami-3.

### Section S8. Dispersion analysis of translocation events

From the distribution of the signals, an interesting situation was discovered that origami-1 has the largest dispersion and origami-3 has the smallest. The reason may result from their different flexibility. The dispersion calculation method of signal is to divide the event distribution scatter graph into several rectangular blocks with length of 0.1ms and width of 0.2nA, and the total number is recorded as N, the number of blocks of statistical signal scatter distribution is n, so the dispersion is  $n/N$  (Fig. S11a). It can be seen from Fig. S11b that the flexibility of origami mainly affects dwell time of event. Fig. S12 shows the dispersion comparison between origami-1 and origami-2.

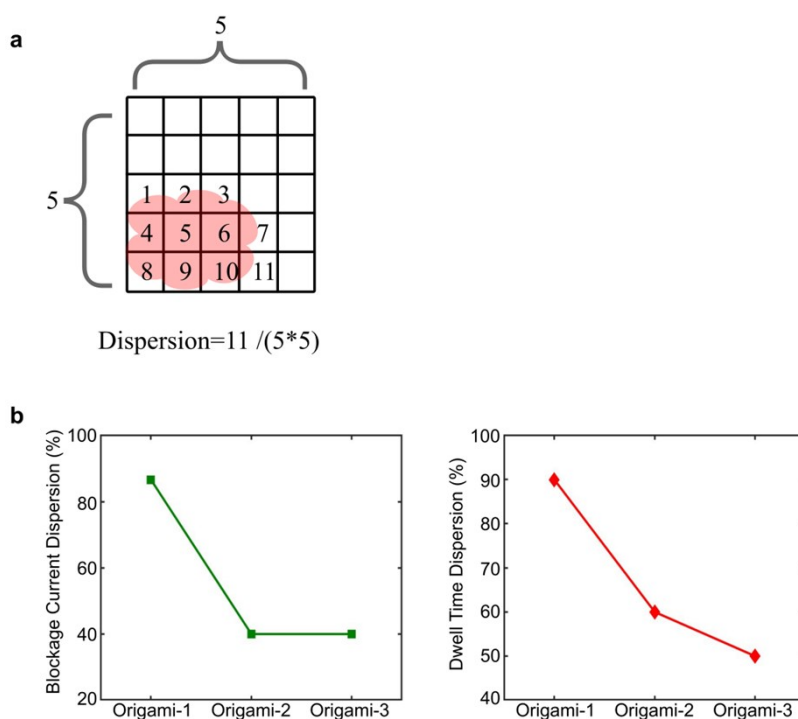

**Figure S11.** Analysis of the flexibility of origami. (a) Calculation formula of dispersion. (b) Comparison of blockage current and dwell time dispersion in three various origami.

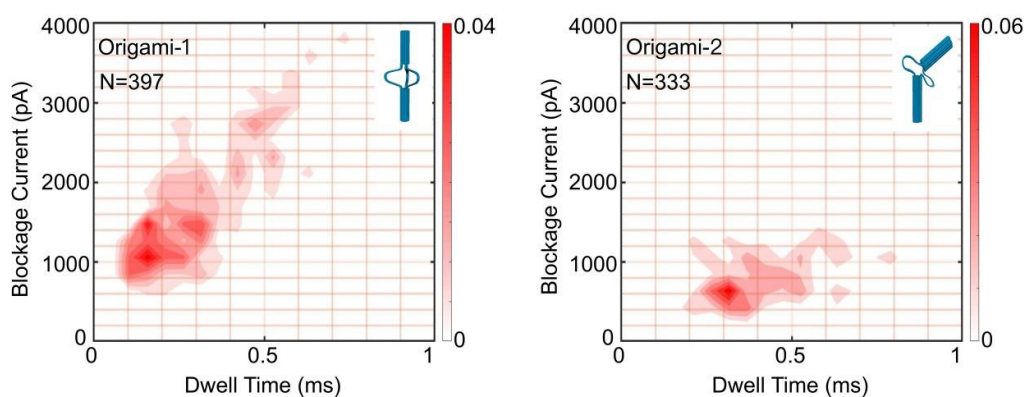

**Figure S12.** The dispersion comparison between origami-1 and origami-2.

In order to verify whether the variation of signal dispersion is caused by different structural flexibility, 15nm connectors were designed to connect the two cylindrical parts. The new structure was named origami-4. Figure. S13 shows the comparison between origami-4 (75nm) and origami-1 (90nm). As can be seen from the TEM image, the origami-4 is not straight, but it has a large angle, close to 180 degrees. From the experimental result, it is easy to conclude that the flexibility of the structure is an important factor affecting the dispersion.

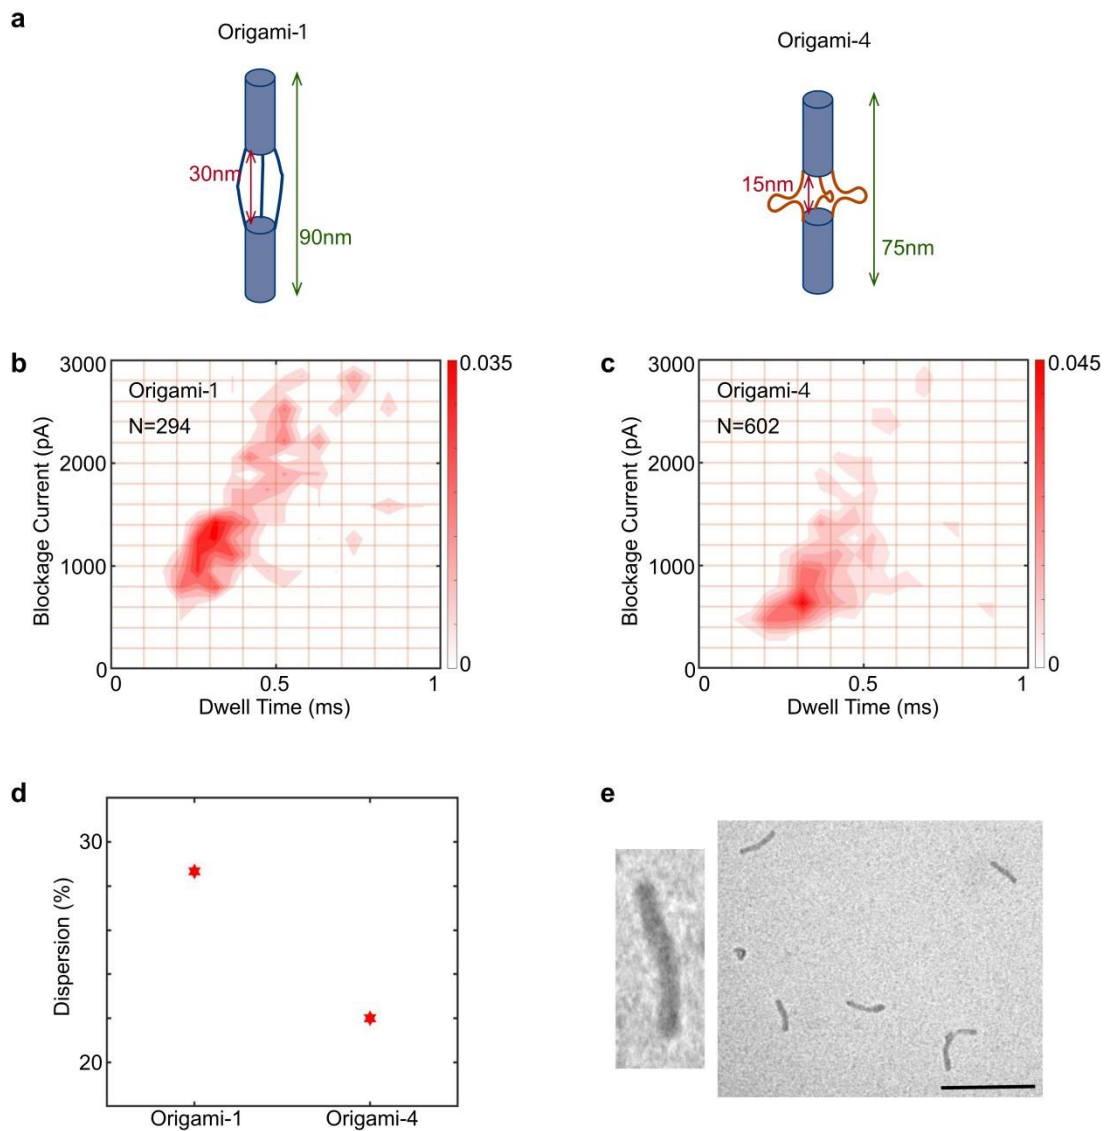

**Figure S13.** Signal dispersion of structures with different lengths. (a)The diagram of origami with three different length. Scatter plot of maximum current blockage versus

dwell time for origami-1(b) and origami-4(c). (d) Comparison of dispersion between origami-1 and origami-4. (e) The TEM images of origami-4, Scale bar: 200 nm.

### **Section S9. Characterization of origami-2 loaded with streptavidin**

When the origami-2 loaded with streptavidin in the corner, all the complexes were more likely to form the same angle. TEM images in Fig. S14 confirmed this conclusion. When origami-2 is combined with a single protein, the binding of the protein makes origami-2 to be an unfreely movable state, and the angle of the structure is relatively concentrated, most of which are 130 degrees(Fig. S14b). It can be clearly seen from the statistical graph that the structure with protein is significantly more concentrated and more stable than the structure without protein(Fig. S14c).



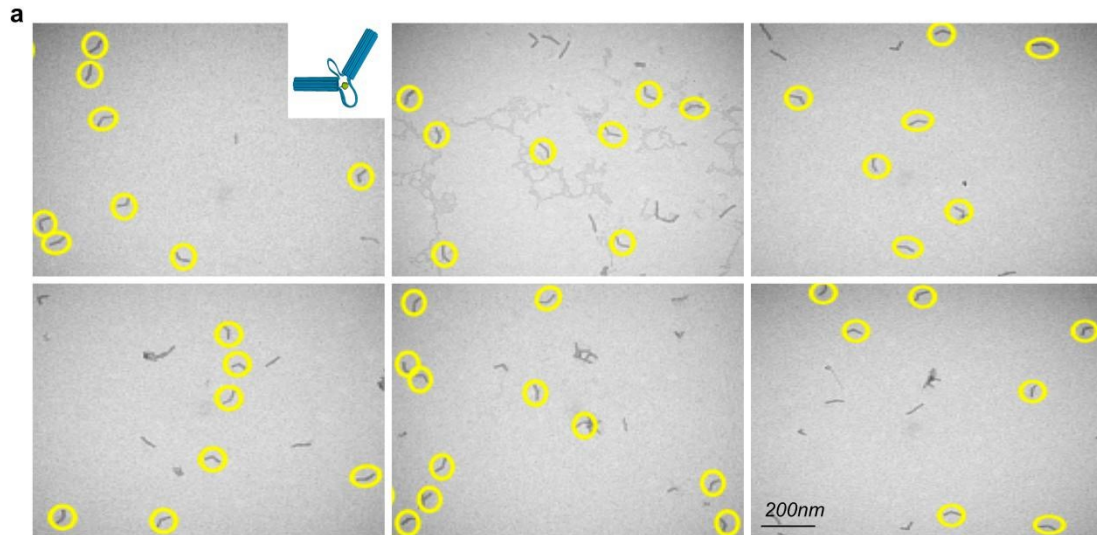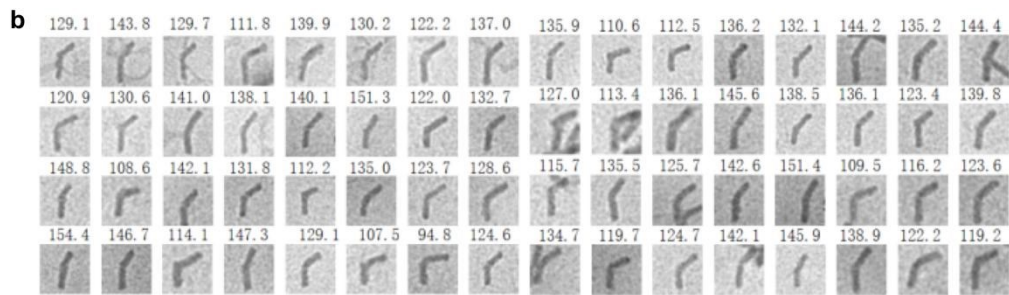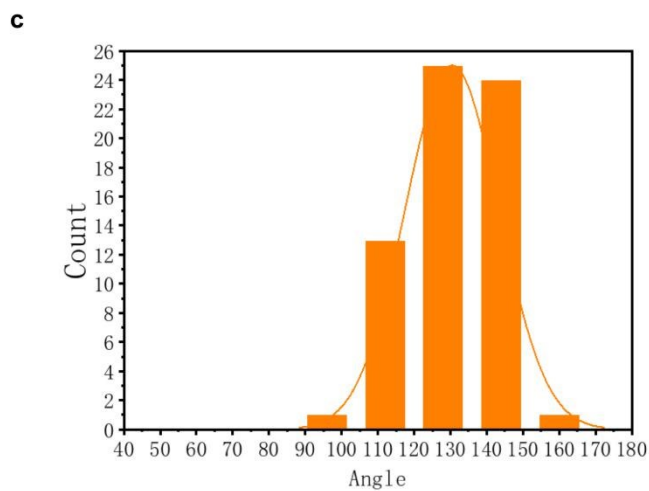

**Figure S14.** (a)TEM images of the origami-2 with a streptavidin under a wide view. The yellow circles enclosed the structures with clear and almost the same angles. (b)The angle array of origami-2. The numbers are measured in smaller angles. (c) Angle distribution of origami-2 with protein.

### Section S10. The DNA sequences used in the experiment



Table S1. List of DNA sequences

| ID      | Sequences(5'-3')                    |
|---------|-------------------------------------|
| bamb-1  | CATTTTTGAACGCCATCAAAAGATTGAC        |
| bamb-2  | CAAAAGAATACGCCACATAACACTAAAA        |
| bamb-3  | CAATAACGGATTTCGAGAAAACAGTACAT       |
| bamb-4  | CCAAAAAATCAAAAGAATAGCCAAGCGG        |
| bamb-5  | ACCTCAAGTGAGGCGGTCAGTAGCCCTA        |
| bamb-6  | TGTCCTTGTCTGAACAAGAAAAAGTAA         |
| bamb-7  | AACGCCAAAACAACATGTTTCAGCTAATTTTT    |
| bamb-8  | TGGTTTTAGGCGAAAATCCTGTTTGATTTTTT    |
| bamb-9  | TTTTTTGCAGAACGCGCTATTAAACCAAGTTTTT  |
| bamb-10 | CCTAATTTAAGAGTATTAGCGAGCATGTTACCCAA |
| bamb-11 | AAATCATAGGTCTGTTAATTTACAGGAGGGCTGAG |
| bamb-12 | GCTTCTGTACCTGAGCAAAGGTTACAATTAGAAT  |
| bamb-13 | ACGCTGAGAAGAGTTTTTTAACCAGTAACAGCATT |
| bamb-14 | TGGAAGTTTCATTCCATAAAGGAATATATAACAGT |
| bamb-15 | GAACGAGCCCTCAGGGTGTAGATGGGCGTGCCGGA |
| bamb-16 | CATGTTAATGCGCGGAATACGTGGCACAGAAATGG |
| bamb-17 | CAACTAAGATTAGCATTGAGCGAGAGATAACCCAC |
| bamb-18 | CTTCGCTTCGCACTCCAGCCAAGTTTGAGCAGGGA |
| bamb-19 | AACGATCCCTTCACTGAGAGAGTTGCAGCCGAGAT |
| bamb-20 | GAGCACGAGGAGCGGGCGCTACCGGCGACGCCACC |
| bamb-21 | CCGTTTTAGAACGCGAGGCGTGTTAAAGTTTGAGG |
| bamb-22 | TGCCATCCGGTCATTTGGAACAAGAGTCGAGGTGC |
| bamb-23 | AATCAATGAATCATGAAGGCTTATCCGGATCGTCA |
| bamb-24 | GATTAAGACCTTTTTAACCTCACTTTTTGTTTTAA |
| bamb-25 | CAGCAAATGAAAAAGCCAGTATAAGGGAACCGGA  |

|         |                                                |
|---------|------------------------------------------------|
| bamb-26 | CCACATTTTAATGCGTCAAATCACCATCTCAACGC            |
| bamb-27 | GCCTGGGGTGCCTAGAGTCTGGAGTTTCATAGGAA            |
| bamb-28 | ATCAACGAATAGTAACTGGATCGTAATGGGATAGG            |
| bamb-29 | CTGAATTGTAATAACAAATATTACCCAAAAGAACT            |
| bamb-30 | GGATTAGAGGAATTATTTTTTAGGGTTGAGTGTTG            |
| bamb-31 | GCGTCTGGCCTTCCTCTCCGTGTCATAAACCATAA            |
| bamb-32 | CGAGAAACGGCTTAATAGCGATAGCTTAAAATCAA            |
| bamb-33 | TTTTTGCCTCAGGAAGAATTACGCCAGCTTTTTTT            |
| bamb-34 | TTTTTTGAAGCGCATTAGGTTGATATAAGTTTTTTTT          |
| bamb-35 | TACCAGAAACCAAAGAAACACTTCGAGCGGCTTAGAG          |
| bamb-36 | TTTTTTTTGGGCGCCAGGGTGTATGGGATTTTTTTTT          |
| bamb-37 | TTTTTTGGCGAAAGGGGGGTACCGAGCTCGAATATCCAG        |
| bamb-38 | AGTAAAAATGAGTGGGAGAGGCGGTTTGCATTTTTTTTT        |
| bamb-39 | CATCTTCGGAAACGCAATAATCGGAATATATGGTTGAATT<br>AG |
| bamb-40 | TGATAAAAAGTAAGCAGATAGAAGAATTAAAGTCAAAAA<br>ATG |
| bamb-41 | CGGTACGTACCTTTTACATCGTTAACAAATTACCTCAATA<br>GT |
| bamb-42 | GGCAAGTGTAGCGGTTTAGAGCCTCAGAAATCAAATGAA<br>AGT |
| bamb-43 | CACCACCAGAGCGTTAGTTAGCCGCCGCGCGTCATTGATG<br>AT |
| bamb-44 | TTGGGTAACGCCAGTGTTGGGACCAACCACGGCTAGTAAT<br>CT |
| bamb-45 | GGTCAGGACCTTTAATTGCTCCGGTGTCCAATTCTGGTGG<br>CA |
| bamb-46 | AGTTTATTTTGTACATATCAGCTAAATCAATAGAAAGAG        |

|         |                                                |
|---------|------------------------------------------------|
|         | AA                                             |
| bamb-47 | AATTGCGAATGAATCGGCCAAACCAGTGGACGTTACGGA<br>GTG |
| bamb-48 | TACCAGGCCTGAACGAGTTAAGCCCAATTTAAGAATAAG<br>GCG |
| bamb-49 | TTAAGAACTAGACGGGCGCGGCTCATTATGCAGATAAAA<br>GGA |
| bamb-50 | AAAATCACCCGATTAGAAAAGTAGCACCATTACCAAGCC<br>AGC |
| bamb-51 | TTTAGCGCGAGAACAAGCAAGATTCCAAGACCTTCAAGA<br>GGA |
| bamb-52 | TACCGTTTGGAAACAAAATTAATTACATGGAGAAAATTTT<br>AG |
| bamb-53 | GTAAAGAAATGCAATAAAGCTAATTAAGTTAGCTATATTT<br>TC |
| bamb-54 | GAGGCTTTCATAACATCAGTTATTTTTGGGGTGAGAAAGG<br>CC |
| bamb-55 | CCCTCAGAGAACCGTGGTTTGAAGTTACCAGAAGGAAAC<br>CGA |
| bamb-56 | TGCGGATTTCAAAGAAGAGGAAGAAAACGAGAATGATAT<br>TCA |
| bamb-57 | CAACAGCCTGCATTTTGCCTCACTGCCCTGAGAACAGA<br>CA   |
| bamb-58 | AGCCACCGGAACCTTTCAACCAGGTGGCAACATATGGCA<br>TGA |
| bamb-59 | AACTGATATTAACACATCACCTTGCTGAATTTAGGACTTT<br>GA |
| bamb-60 | TGAACGGAGCCCCAAAACAGTTCGCATAAACTATTGC<br>AAA   |

|         |                                                 |
|---------|-------------------------------------------------|
| bamb-61 | CTTATAAAAAGGCTAGCCATAAAAATAGCAGCCTTTGAA<br>CAC  |
| bamb-62 | ACCCTCAGCCTGTACTTTCCAAGACGGGTCCACGCTGGTT<br>TG  |
| bamb-63 | TTATTTATCCCAATAAAAATCTAAAGGAATTGTCGTGCATT<br>CC |
| bamb-64 | GCCAAAGACGCAAAGACACCAAACGGAAATTTTAGAGAG<br>ACT  |
| bamb-65 | GGAACGAGTCAATCAATAAGATACCGACAAAAGGTAAT<br>AAT   |
| bamb-66 | AGCCACCTGGCAATCTTCTGAATAATGGTTAACGTTTATA<br>AT  |
| bamb-67 | GCGGATTATCAAAAATCAGGTAATACTGTTGCCAGGGCAT<br>AG  |
| bamb-68 | GCGGAATCGGAACACATTTGAGGATTTATTAATATCACC<br>GT   |
| bamb-69 | ACCCCGGTTGATAAATCAGCTATTACGAAGGGGGTTAAC<br>AAA  |
| bamb-70 | AGGTGTAAGAATAATACCGAAGCCCTTAATAAGAAATT<br>AAC   |
| bamb-71 | CAGGACGCCTGTAAAAGGATAAAAATTTGGAGACACGGA<br>GAG  |
| bamb-72 | TCAGAACACGTGGCCGTGAACCATCACCCAACGTAGCG<br>TCA   |
| bamb-73 | CCGAACAAAATACCAATTCGATTAATTTTAAAAGTCAGAT<br>GA  |
| bamb-74 | GCGCAACGGTTTTCCAAGCTTGCATGCCGCTCATCCCCA<br>GC   |
| bamb-75 | TACAGAGGTTACAAAATAAACCCAAAAGGTTTCAGGTAA         |

|         |                                                       |
|---------|-------------------------------------------------------|
|         | ATG                                                   |
| bamb-76 | AAAAGAAACAAAAGTCACCGACCAATGAAACCATCGACT<br>GTA        |
| bamb-77 | AGATATATACCGCGCCCAATAGCTATTACTGACAAGCAA<br>ATC        |
| bamb-78 | GCTGGCTGAACGGGCTGTTTATCAACAACGACAATACATG<br>TA        |
| bamb-79 | GTACAAAGCCACCGGTAGATTTTCAGGTAAGGGTTTGATT<br>AT        |
| bamb-80 | GATAGCAGTGAATTATCACCGGGCGACAATTATTCCGGG<br>GTC        |
| bamb-81 | CCCCCGATCACGCTCGCCGCTACAGGGCGGCCGATGGTTG<br>AG        |
| bamb-82 | TTTTTTTGTATCATCCGAACGATCTGGCCAACAGAGCAGT<br>AAT       |
| bamb-83 | TTTTTTTCGTAACACTTCCATCAAAACAGAAATAAAGCAA<br>AATT      |
| bamb-84 | CCTCATATATTTTATTCAAAAAGAGATCTGGAGCAGTATA<br>AGCA      |
| bamb-85 | TTTTTTCCATTAAACGGACGGAGAAACAATAAAAAGGGA<br>CTTTTT     |
| bamb-86 | AACAGAGATATCAAACCCTCAATTTAACACGGTGTACAG<br>ATTTTTT    |
| bamb-87 | TTTTTCAATAGCTATCTACACCGGGATAATAAAGAAACCA<br>TTTTTTTT  |
| bamb-88 | ATCAAGACAGAGGCGCCGCTTACCGTGCATCTGCCGCTTT<br>CCATCGGTG |
| bamb-89 | ATTATTCGGAGGGACCCCTGCCTATTTACCGGAATGCCT<br>TTCAAAGGG  |

|          |                                                        |
|----------|--------------------------------------------------------|
| bamb-90  | TTTTTTTATAGCCCGGAATCCCATGTAGAAGGAATTTGCA<br>CGTTTTTTT  |
| bamb-91  | TTAGCAAGGCCGGAGCATTTTTTTTCATGCCGCCAGACAG<br>GATAAAGGG  |
| bamb-92  | GAACCAGCTCAGAGAGACGATGGAGCTAGCTTTGAATAC<br>CAAAGATGA   |
| bamb-93  | GTGCCGTTTCAACAGAGCCTTAATCGGCAAAATCCCCCA<br>GCTCTTTTC   |
| bamb-94  | ATTTTCGTCTAAAGCCGCCTGCAACAGTGTCTTTACTTAG<br>CCCACTCAT  |
| bamb-95  | TGACCTAAATTTAACCACCCTCAGCTTTACATGGAACCGC<br>CAGCCCTCA  |
| bamb-96  | CAAAGAATTAGCAAAAATCGGAATAAAAAAGATTCCCTC<br>GTTATATTTT  |
| bamb-97  | TACTTTTTAACATCTCAATTCTACTAATAGGCCAGTGAGA<br>TAGTAGCAT  |
| bamb-98  | TTAGAACAAAAACAGGCAAGGGCGCGAGCTGAAAAGCG<br>AACGTGTGAAT  |
| bamb-99  | CCAGAACAAGGGAGCGTAAAGCACTAAATCGGCCCCCGCC<br>TGGAACCCTA |
| bamb-100 | GGGCGCTATGGTTGCTTTGACCAGAGCGTGGCCTTCCAGA<br>ATAGTGCCT  |
| bamb-101 | CCTACATGCCAGTGCCAGTCACGACGTTGTTATGTAATCA<br>AAAACGACG  |
| bamb-102 | CGGATAAACTCAGGGGATAGCATATTCCAGAACCTACCA<br>TATAAATTGC  |
| bamb-103 | AAAGAGGTCAGGCTAACCAGGCAAAGCGCCAATAGTAAC<br>CATTCGCCAT  |
| bamb-104 | AGCGTCCCTTTACCTAGTCAGAAGCAAATCCAACAGCTGC               |

|          |                                                        |
|----------|--------------------------------------------------------|
|          | TCTACCTTA                                              |
| bamb-105 | CCAATCGACTATATTCCTTAGAATCCTTAACCTTATTAA<br>AGGATATTC   |
| bamb-106 | TTTTTCACCAGCAGAAGATAAAAAATACGCCTGATAAGTA<br>CAGTAAAAT  |
| bamb-107 | TACAAAGAGGTAGACGAACTAGAGATGGAGATACAGTAG<br>CTCAACATGT  |
| bamb-108 | TGAAACAATCACCGGCGCGTTAAAGAACGTGGACTCAAA<br>TCAGGGAAAG  |
| bamb-109 | TTCCAGTAGCCCCCTTTAATAGCGAAATTAGCGTTACTCC<br>TCAAATTCA  |
| bamb-110 | TTTGACGCTAACCGTATTCCAATCGTCTGACAATAGCTAT<br>TAGCCACGC  |
| bamb-111 | GGTAGCATAAAACGCTTTGACGGAAATAATTATTTACATT<br>GGAGCGTAA  |
| bamb-112 | TTACCGCTCCCCGGATGTGCTGCAAGGCCGGGCCTACGTA<br>ATACTAAAG  |
| bamb-113 | GAGTGAATGAAAACGGTTGGGTTATATACAAGACATGAG<br>TAACAGTGCC  |
| bamb-114 | CCTGCTCCTGACCACAGAGGCTTCTGTCCAGACGATAGAT<br>AACCTTATC  |
| bamb-115 | GCAGTCTGCAGGTCCCACCACCTTGACGAGTTTTTTGGGG<br>TCCACTATT  |
| bamb-116 | AGTGTTTCAGATGAATATACAGATTATATCATCAAAACGT<br>TACAACCTCG |
| bamb-117 | TCCGCGAGATTATACGAAGGCAAGGGCGGGCACCGCTTC<br>TGGCATCGTA  |
| bamb-118 | AAGAACGTTAAGACTCCTTATTACATAAGATTGAGATTAA<br>AGGCACCGT  |

|          |                                                         |
|----------|---------------------------------------------------------|
| bamb-119 | GATTAAGTCGACTCTAGAGGACAGCCATCGAAACAAAAT<br>TGTCAGATGA   |
| bamb-120 | GAAGTATACATTATCATTTTTGTATCATCAAGCCCAGTCAC<br>CAAATTTTC  |
| bamb-121 | GCATCAAAAAGATTCTGAACCAGCTTGCCTCAACTTCTACG<br>TTTTGTACC  |
| bamb-122 | TTGAGTATAGACTTTACAAACGACCGTGGTACCGCTGCTC<br>AGAGAATAG   |
| bamb-123 | TTCATCGAACGTCACCTTGAGCCATTTGGTACCAGCATTAA<br>GATGTA CTG |
| bamb-124 | TTGCGGGTATTCTATATTTTCATCGTAGAATCGGCTGACA<br>AGAACCGAA   |
| bamb-125 | CTTAATGGCGCGTAACCACCACAGGGAACAGTCCCCGCC<br>GCGACAGGAA   |
| bamb-126 | GCGGGAGAAGAATGTTTTTGCCTTTATTAATATGATTCTA<br>GCGCATGTC   |
| bamb-127 | ATTCAGTAGAAGTTCGGAATCGGGAACAAACGGCGATAA<br>TTCTTGTTAA   |
| bamb-128 | CGCGCGGAGCTAACTCACATTCAGTGAGCTACA ACTTTTC<br>AGAGGTTTA  |
| bamb-129 | GAAAAATTAATCATAGTAGATATGCAACTAAAGTACTTTT<br>GAAGCAAAC   |
| bamb-130 | GGAAAGCTATATGTTGAAACAAACATCACCTGATTAACA<br>GGAGCGTACT   |
| bamb-131 | TGTAGCCGTTAAAAGAAGATTAACAAGAGAATCGAGGTA<br>GCTGAGATTT   |
| bamb-132 | CAATAAATCATA CATTATGACTTGGGAAAGGAATATAAG<br>AGCTAAATTT  |
| bamb-133 | GCCACTACCAAGCGTGCAACAACCAGTCACACGACATAG                 |



|          |                                                                |
|----------|----------------------------------------------------------------|
|          | AACGCCATTA                                                     |
| bamb-134 | GTAACAGCCAGAATCGCTTTCACCTGTCGTGCCAGTGATT<br>GCTAAAGTT          |
| bamb-135 | GACCATTTTTAATTCTGACGAATAGCGATTGAATCACAAC<br>CCGTCCGGAT         |
| bamb-136 | CACGTTGCCAAATATTTTGTTTAACGTCGAGGGTAGGGGT<br>TTCACCCTC          |
| bamb-137 | GTCGAAAAAACATCCCTTCTGACCTGAACAGATTCCGGAA<br>AAACTGCAGG         |
| bamb-138 | GAATAAGGACCGGATAAGAGGTCATTTTTTTAAATTTAGT<br>TTATTTGGG          |
| bamb-139 | TTTTTTACCGCACTCATAACCTCCCGACTTGGGTGCTCAT<br>GAGGAAGTTTTTTT     |
| bamb-140 | TATTAATCTATCAGAATTCTTTGCCCGTATAATCCTTTTG<br>ATTCAGATTGTTTG     |
| bamb-141 | TCACGTTCAGCGAAAGTTTAGAAATGACAGCATCGTATTC<br>ATAGAAACCATCCCAT   |
| bamb-142 | TCAGAAATAATCGTAAAACCTATGATAAACAACTAATACC<br>AGTTGCGATTTGATTCC  |
| bamb-143 | TTTTTTTTGCTAAACAACCTCGAGAGGACGGGAGGCAAGA<br>AACAATGAAATAGTTTTT |
| bamb-144 | TTTTTTCCAGGCGCATAGACTTTTTGAGGCTTGGGGACGA<br>CGACAGTATCGTTTTTT  |
| bamb-145 | TTTTTTTTGGTGGTCCGATAATTGTTTTGCCAAGAATAAC<br>ATAAAAACAGGTTTTTT  |
| H1       | CGCCCACGCATAACCGATATACAGCTTGCTTTCGAGGTGA<br>AT                 |
| H2       | CAACGCTAACGAGCGTCTTTCGAGGTTTTGAAGCCTTAAA<br>TC                 |

|             |                                                 |
|-------------|-------------------------------------------------|
| H3          | GTAGGGCTTAATTGAGAATCGCATAATTACTAGAAAAAG<br>CCT  |
| H4          | ACTAATAGATTAGAGCCGTCAATATCTGGTCAGTTGGCAA<br>AT  |
| H5          | CAAACCTATCGGCCTTGCTGGCAAATTAACCGTTGTAGCAA<br>TA |
| H6          | CGAGCCGGAAGCATAAAGTGTAGTAATCATGGTCATAGC<br>TGT  |
| bamb-33-bio | biotin-TTTTTTGCCTCAGGAAGAATTACGCCAGCTTTTTTT     |
| bamb-8-bio  | biotin-TGGTTTTAGGCGAAAATCCTGTTTGATTTTTTT        |
